# Supplementary material for: Antigen-specific antibody Fc glycosylation enhances humoral immunity via the recruitment of complement
Source: PubMed Central journal article supplement (PMC6298214; doi:10.1126/sciimmunol.aat7796), 2018-08-17

**A**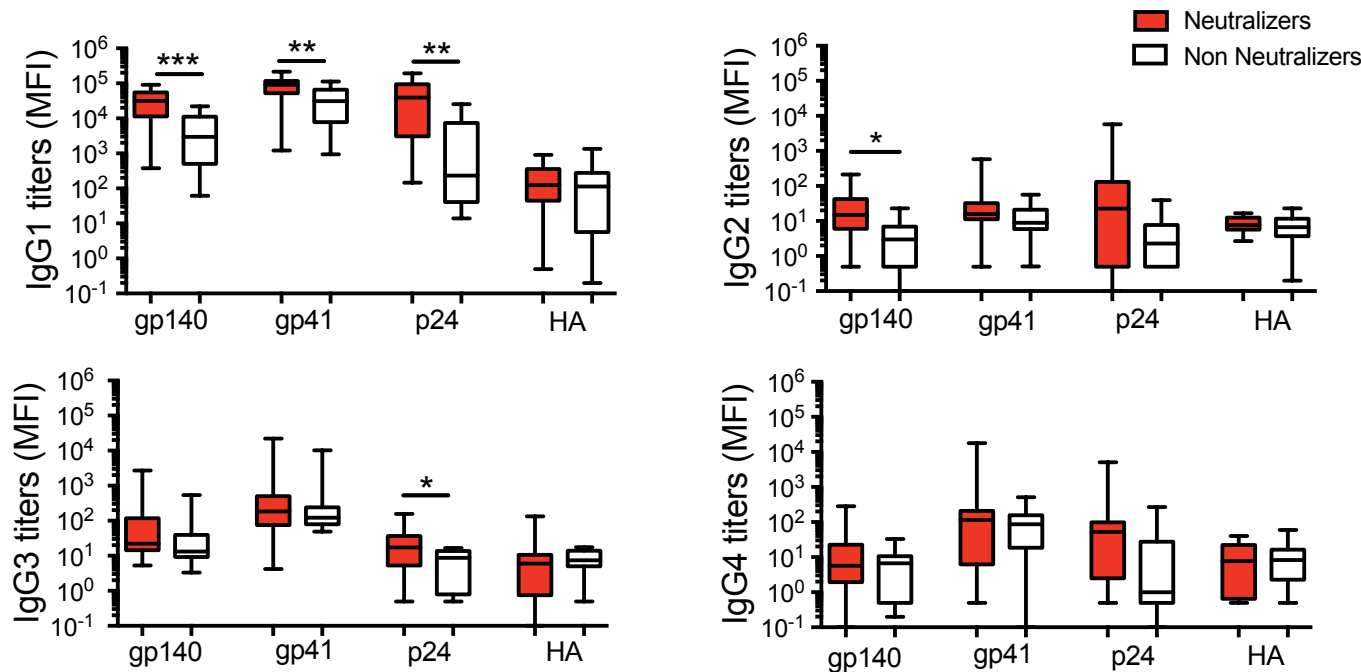

Supplemental figure 2

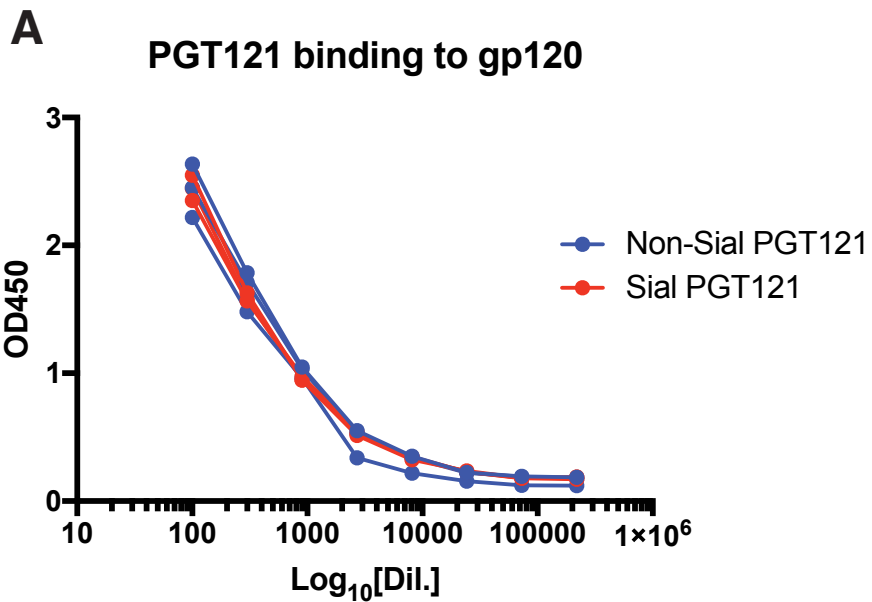

Supplement: NIHMS994440-supplement-Supplemental_Figs.pdf [file NIHMS994440-supplement-Supplemental_Figs.pdf]
